# Supplementary material
Source: bioRxiv or medRxiv preprint supplement (https://medrxiv.org/content/medrxiv/early/2024/09/19/2024.09.18.24313869/DC2/embed/media-2.pdf)
Supplement: Supplementary file [file media-2.pdf]

## Hospital-based surveillance of COVID-19, Influenza & Respiratory diseases in Switzerland {BASEC 2020-00827} [2020+] - [Quality and Site SURVEYS] PID

365

Codebook ▾

### Data Dictionary Codebook

18.04.2023 14:13

[^ Collapse all instruments](#)

| #                                                                                                                                                  | Variable / Field Name                                | Field Label<br><i>Field Note</i>                                                                                                                                                                                                                                                                            | Field Attributes (Field Type, Validation, Choices, Calculations, etc.)                                                                                                                                                                                                                                                               |   |                                |   |                           |   |                                   |   |                                                      |   |                                |
|----------------------------------------------------------------------------------------------------------------------------------------------------|------------------------------------------------------|-------------------------------------------------------------------------------------------------------------------------------------------------------------------------------------------------------------------------------------------------------------------------------------------------------------|--------------------------------------------------------------------------------------------------------------------------------------------------------------------------------------------------------------------------------------------------------------------------------------------------------------------------------------|---|--------------------------------|---|---------------------------|---|-----------------------------------|---|------------------------------------------------------|---|--------------------------------|
| Instrument: <b>Survey-CH-SUR-Evaluation</b> (surveychsrevaluation) <span style="color: green;">Enabled as survey</span> <a href="#">^ Collapse</a> |                                                      |                                                                                                                                                                                                                                                                                                             |                                                                                                                                                                                                                                                                                                                                      |   |                                |   |                           |   |                                   |   |                                                      |   |                                |
| 1                                                                                                                                                  | record_id                                            | Record ID                                                                                                                                                                                                                                                                                                   | text                                                                                                                                                                                                                                                                                                                                 |   |                                |   |                           |   |                                   |   |                                                      |   |                                |
| 2                                                                                                                                                  | dummy_111                                            | Section Header: <i>Evaluation of the CH-SUR surveillance system for Hospitalisations related to Influenza and Covid-19 in Switzerland</i><br>Welcome to the survey evaluation of the CH-SUR system. With the following questions we aim to improve our system and publish a scientific research manuscript. | descriptive                                                                                                                                                                                                                                                                                                                          |   |                                |   |                           |   |                                   |   |                                                      |   |                                |
| 3                                                                                                                                                  | role                                                 | What is your role with respect to CH-SUR ?                                                                                                                                                                                                                                                                  | radio, Required<br><table border="1"> <tr><td>1</td><td>Principal Investigator</td></tr> <tr><td>2</td><td>Study Nurse</td></tr> <tr><td>3</td><td>Researcher</td></tr> <tr><td>4</td><td>Member of the Federal Office of Public Health or ISG</td></tr> </table>                                                                    | 1 | Principal Investigator         | 2 | Study Nurse               | 3 | Researcher                        | 4 | Member of the Federal Office of Public Health or ISG |   |                                |
| 1                                                                                                                                                  | Principal Investigator                               |                                                                                                                                                                                                                                                                                                             |                                                                                                                                                                                                                                                                                                                                      |   |                                |   |                           |   |                                   |   |                                                      |   |                                |
| 2                                                                                                                                                  | Study Nurse                                          |                                                                                                                                                                                                                                                                                                             |                                                                                                                                                                                                                                                                                                                                      |   |                                |   |                           |   |                                   |   |                                                      |   |                                |
| 3                                                                                                                                                  | Researcher                                           |                                                                                                                                                                                                                                                                                                             |                                                                                                                                                                                                                                                                                                                                      |   |                                |   |                           |   |                                   |   |                                                      |   |                                |
| 4                                                                                                                                                  | Member of the Federal Office of Public Health or ISG |                                                                                                                                                                                                                                                                                                             |                                                                                                                                                                                                                                                                                                                                      |   |                                |   |                           |   |                                   |   |                                                      |   |                                |
| 4                                                                                                                                                  | duration_work                                        | How long have you been working with CH-SUR / ISG?                                                                                                                                                                                                                                                           | radio<br><table border="1"> <tr><td>1</td><td>Less than 6 months</td></tr> <tr><td>2</td><td>6 months to 1 year</td></tr> <tr><td>3</td><td>1 year to 2 years</td></tr> <tr><td>4</td><td>More than 2 years</td></tr> </table>                                                                                                       | 1 | Less than 6 months             | 2 | 6 months to 1 year        | 3 | 1 year to 2 years                 | 4 | More than 2 years                                    |   |                                |
| 1                                                                                                                                                  | Less than 6 months                                   |                                                                                                                                                                                                                                                                                                             |                                                                                                                                                                                                                                                                                                                                      |   |                                |   |                           |   |                                   |   |                                                      |   |                                |
| 2                                                                                                                                                  | 6 months to 1 year                                   |                                                                                                                                                                                                                                                                                                             |                                                                                                                                                                                                                                                                                                                                      |   |                                |   |                           |   |                                   |   |                                                      |   |                                |
| 3                                                                                                                                                  | 1 year to 2 years                                    |                                                                                                                                                                                                                                                                                                             |                                                                                                                                                                                                                                                                                                                                      |   |                                |   |                           |   |                                   |   |                                                      |   |                                |
| 4                                                                                                                                                  | More than 2 years                                    |                                                                                                                                                                                                                                                                                                             |                                                                                                                                                                                                                                                                                                                                      |   |                                |   |                           |   |                                   |   |                                                      |   |                                |
| 5                                                                                                                                                  | comprehension                                        | How well do you comprehend the CH-SUR system and its objectives?                                                                                                                                                                                                                                            | radio<br><table border="1"> <tr><td>1</td><td>I understand it extremely well</td></tr> <tr><td>2</td><td>I understand it very well</td></tr> <tr><td>3</td><td>I have an average understanding</td></tr> <tr><td>4</td><td>I do not understand it well</td></tr> <tr><td>5</td><td>I have no understanding at all</td></tr> </table> | 1 | I understand it extremely well | 2 | I understand it very well | 3 | I have an average understanding   | 4 | I do not understand it well                          | 5 | I have no understanding at all |
| 1                                                                                                                                                  | I understand it extremely well                       |                                                                                                                                                                                                                                                                                                             |                                                                                                                                                                                                                                                                                                                                      |   |                                |   |                           |   |                                   |   |                                                      |   |                                |
| 2                                                                                                                                                  | I understand it very well                            |                                                                                                                                                                                                                                                                                                             |                                                                                                                                                                                                                                                                                                                                      |   |                                |   |                           |   |                                   |   |                                                      |   |                                |
| 3                                                                                                                                                  | I have an average understanding                      |                                                                                                                                                                                                                                                                                                             |                                                                                                                                                                                                                                                                                                                                      |   |                                |   |                           |   |                                   |   |                                                      |   |                                |
| 4                                                                                                                                                  | I do not understand it well                          |                                                                                                                                                                                                                                                                                                             |                                                                                                                                                                                                                                                                                                                                      |   |                                |   |                           |   |                                   |   |                                                      |   |                                |
| 5                                                                                                                                                  | I have no understanding at all                       |                                                                                                                                                                                                                                                                                                             |                                                                                                                                                                                                                                                                                                                                      |   |                                |   |                           |   |                                   |   |                                                      |   |                                |
| 6                                                                                                                                                  | rating_importance                                    | Rate the importance of the CH-SUR system.                                                                                                                                                                                                                                                                   | radio<br><table border="1"> <tr><td>1</td><td>Highly important</td></tr> <tr><td>2</td><td>Important</td></tr> <tr><td>3</td><td>Neither important nor unimportant</td></tr> <tr><td>4</td><td>Unimportant</td></tr> <tr><td>5</td><td>Highly unimportant</td></tr> </table>                                                         | 1 | Highly important               | 2 | Important                 | 3 | Neither important nor unimportant | 4 | Unimportant                                          | 5 | Highly unimportant             |
| 1                                                                                                                                                  | Highly important                                     |                                                                                                                                                                                                                                                                                                             |                                                                                                                                                                                                                                                                                                                                      |   |                                |   |                           |   |                                   |   |                                                      |   |                                |
| 2                                                                                                                                                  | Important                                            |                                                                                                                                                                                                                                                                                                             |                                                                                                                                                                                                                                                                                                                                      |   |                                |   |                           |   |                                   |   |                                                      |   |                                |
| 3                                                                                                                                                  | Neither important nor unimportant                    |                                                                                                                                                                                                                                                                                                             |                                                                                                                                                                                                                                                                                                                                      |   |                                |   |                           |   |                                   |   |                                                      |   |                                |
| 4                                                                                                                                                  | Unimportant                                          |                                                                                                                                                                                                                                                                                                             |                                                                                                                                                                                                                                                                                                                                      |   |                                |   |                           |   |                                   |   |                                                      |   |                                |
| 5                                                                                                                                                  | Highly unimportant                                   |                                                                                                                                                                                                                                                                                                             |                                                                                                                                                                                                                                                                                                                                      |   |                                |   |                           |   |                                   |   |                                                      |   |                                |
| 7                                                                                                                                                  | org_objectives                                       | How relevant is the CH-SUR system to your organization's objectives and goals?                                                                                                                                                                                                                              | radio<br><table border="1"> <tr><td>1</td><td>Highly relevant</td></tr> <tr><td>2</td><td>relevant</td></tr> <tr><td>3</td><td>Neither relevant nor irrelevant</td></tr> <tr><td>4</td><td>Irrelevant</td></tr> <tr><td>5</td><td>Highly irrelevant</td></tr> </table>                                                               | 1 | Highly relevant                | 2 | relevant                  | 3 | Neither relevant nor irrelevant   | 4 | Irrelevant                                           | 5 | Highly irrelevant              |
| 1                                                                                                                                                  | Highly relevant                                      |                                                                                                                                                                                                                                                                                                             |                                                                                                                                                                                                                                                                                                                                      |   |                                |   |                           |   |                                   |   |                                                      |   |                                |
| 2                                                                                                                                                  | relevant                                             |                                                                                                                                                                                                                                                                                                             |                                                                                                                                                                                                                                                                                                                                      |   |                                |   |                           |   |                                   |   |                                                      |   |                                |
| 3                                                                                                                                                  | Neither relevant nor irrelevant                      |                                                                                                                                                                                                                                                                                                             |                                                                                                                                                                                                                                                                                                                                      |   |                                |   |                           |   |                                   |   |                                                      |   |                                |
| 4                                                                                                                                                  | Irrelevant                                           |                                                                                                                                                                                                                                                                                                             |                                                                                                                                                                                                                                                                                                                                      |   |                                |   |                           |   |                                   |   |                                                      |   |                                |
| 5                                                                                                                                                  | Highly irrelevant                                    |                                                                                                                                                                                                                                                                                                             |                                                                                                                                                                                                                                                                                                                                      |   |                                |   |                           |   |                                   |   |                                                      |   |                                |

|    |                                                                          |                                                                                                                                                             |                                                                                                                                                                                                                                                                                                                                                                                                         |   |                                            |   |                                               |    |                                                    |   |                                       |   |                                               |
|----|--------------------------------------------------------------------------|-------------------------------------------------------------------------------------------------------------------------------------------------------------|---------------------------------------------------------------------------------------------------------------------------------------------------------------------------------------------------------------------------------------------------------------------------------------------------------------------------------------------------------------------------------------------------------|---|--------------------------------------------|---|-----------------------------------------------|----|----------------------------------------------------|---|---------------------------------------|---|-----------------------------------------------|
| 8  | adapt_org                                                                | How adaptable has the CH-SUR system been to your organization's needs?                                                                                      | radio<br><table border="1"> <tr><td>1</td><td>Highly adaptable</td></tr> <tr><td>2</td><td>Adaptable</td></tr> <tr><td>3</td><td>Neither adaptable nor unadaptable (Not applicable)</td></tr> <tr><td>4</td><td>Unadaptable</td></tr> <tr><td>5</td><td>Highly unadaptable</td></tr> </table>                                                                                                           | 1 | Highly adaptable                           | 2 | Adaptable                                     | 3  | Neither adaptable nor unadaptable (Not applicable) | 4 | Unadaptable                           | 5 | Highly unadaptable                            |
| 1  | Highly adaptable                                                         |                                                                                                                                                             |                                                                                                                                                                                                                                                                                                                                                                                                         |   |                                            |   |                                               |    |                                                    |   |                                       |   |                                               |
| 2  | Adaptable                                                                |                                                                                                                                                             |                                                                                                                                                                                                                                                                                                                                                                                                         |   |                                            |   |                                               |    |                                                    |   |                                       |   |                                               |
| 3  | Neither adaptable nor unadaptable (Not applicable)                       |                                                                                                                                                             |                                                                                                                                                                                                                                                                                                                                                                                                         |   |                                            |   |                                               |    |                                                    |   |                                       |   |                                               |
| 4  | Unadaptable                                                              |                                                                                                                                                             |                                                                                                                                                                                                                                                                                                                                                                                                         |   |                                            |   |                                               |    |                                                    |   |                                       |   |                                               |
| 5  | Highly unadaptable                                                       |                                                                                                                                                             |                                                                                                                                                                                                                                                                                                                                                                                                         |   |                                            |   |                                               |    |                                                    |   |                                       |   |                                               |
| 9  | difficulty_use                                                           | Overall, how easy or difficult is it to use the CH-SUR system?<br><br>(i.e., data collection on REDCap, etc.)                                               | radio<br><table border="1"> <tr><td>1</td><td>Very Easy</td></tr> <tr><td>2</td><td>Easy</td></tr> <tr><td>3</td><td>Average</td></tr> <tr><td>4</td><td>Difficult</td></tr> <tr><td>5</td><td>Extremely Difficult</td></tr> </table>                                                                                                                                                                   | 1 | Very Easy                                  | 2 | Easy                                          | 3  | Average                                            | 4 | Difficult                             | 5 | Extremely Difficult                           |
| 1  | Very Easy                                                                |                                                                                                                                                             |                                                                                                                                                                                                                                                                                                                                                                                                         |   |                                            |   |                                               |    |                                                    |   |                                       |   |                                               |
| 2  | Easy                                                                     |                                                                                                                                                             |                                                                                                                                                                                                                                                                                                                                                                                                         |   |                                            |   |                                               |    |                                                    |   |                                       |   |                                               |
| 3  | Average                                                                  |                                                                                                                                                             |                                                                                                                                                                                                                                                                                                                                                                                                         |   |                                            |   |                                               |    |                                                    |   |                                       |   |                                               |
| 4  | Difficult                                                                |                                                                                                                                                             |                                                                                                                                                                                                                                                                                                                                                                                                         |   |                                            |   |                                               |    |                                                    |   |                                       |   |                                               |
| 5  | Extremely Difficult                                                      |                                                                                                                                                             |                                                                                                                                                                                                                                                                                                                                                                                                         |   |                                            |   |                                               |    |                                                    |   |                                       |   |                                               |
| 10 | reliability                                                              | Rate CH-SUR system's reliability and availability.                                                                                                          | radio<br><table border="1"> <tr><td>1</td><td>Highly reliable (no failure in the system)</td></tr> <tr><td>2</td><td>Reliable (little to no failure in the system)</td></tr> <tr><td>3</td><td>Average (little system failures at times)</td></tr> <tr><td>4</td><td>Unreliable (multiple system failures)</td></tr> <tr><td>5</td><td>Highly unreliable (countless system failures)</td></tr> </table> | 1 | Highly reliable (no failure in the system) | 2 | Reliable (little to no failure in the system) | 3  | Average (little system failures at times)          | 4 | Unreliable (multiple system failures) | 5 | Highly unreliable (countless system failures) |
| 1  | Highly reliable (no failure in the system)                               |                                                                                                                                                             |                                                                                                                                                                                                                                                                                                                                                                                                         |   |                                            |   |                                               |    |                                                    |   |                                       |   |                                               |
| 2  | Reliable (little to no failure in the system)                            |                                                                                                                                                             |                                                                                                                                                                                                                                                                                                                                                                                                         |   |                                            |   |                                               |    |                                                    |   |                                       |   |                                               |
| 3  | Average (little system failures at times)                                |                                                                                                                                                             |                                                                                                                                                                                                                                                                                                                                                                                                         |   |                                            |   |                                               |    |                                                    |   |                                       |   |                                               |
| 4  | Unreliable (multiple system failures)                                    |                                                                                                                                                             |                                                                                                                                                                                                                                                                                                                                                                                                         |   |                                            |   |                                               |    |                                                    |   |                                       |   |                                               |
| 5  | Highly unreliable (countless system failures)                            |                                                                                                                                                             |                                                                                                                                                                                                                                                                                                                                                                                                         |   |                                            |   |                                               |    |                                                    |   |                                       |   |                                               |
| 11 | long_engage                                                              | How likely is your organization to keep long term engagement with the CH-SUR system?                                                                        | radio<br><table border="1"> <tr><td>1</td><td>Highly likely</td></tr> <tr><td>2</td><td>Likely</td></tr> <tr><td>3</td><td>Neutral (unsure at this time)</td></tr> <tr><td>4</td><td>Unlikely</td></tr> <tr><td>5</td><td>Highly unlikely</td></tr> </table>                                                                                                                                            | 1 | Highly likely                              | 2 | Likely                                        | 3  | Neutral (unsure at this time)                      | 4 | Unlikely                              | 5 | Highly unlikely                               |
| 1  | Highly likely                                                            |                                                                                                                                                             |                                                                                                                                                                                                                                                                                                                                                                                                         |   |                                            |   |                                               |    |                                                    |   |                                       |   |                                               |
| 2  | Likely                                                                   |                                                                                                                                                             |                                                                                                                                                                                                                                                                                                                                                                                                         |   |                                            |   |                                               |    |                                                    |   |                                       |   |                                               |
| 3  | Neutral (unsure at this time)                                            |                                                                                                                                                             |                                                                                                                                                                                                                                                                                                                                                                                                         |   |                                            |   |                                               |    |                                                    |   |                                       |   |                                               |
| 4  | Unlikely                                                                 |                                                                                                                                                             |                                                                                                                                                                                                                                                                                                                                                                                                         |   |                                            |   |                                               |    |                                                    |   |                                       |   |                                               |
| 5  | Highly unlikely                                                          |                                                                                                                                                             |                                                                                                                                                                                                                                                                                                                                                                                                         |   |                                            |   |                                               |    |                                                    |   |                                       |   |                                               |
| 12 | issues_isg                                                               | Did you encounter any significant issues with the surveillance staff at ISG?                                                                                | radio<br><table border="1"> <tr><td>1</td><td>Yes</td></tr> <tr><td>0</td><td>No</td></tr> <tr><td>-1</td><td>Not applicable</td></tr> </table>                                                                                                                                                                                                                                                         | 1 | Yes                                        | 0 | No                                            | -1 | Not applicable                                     |   |                                       |   |                                               |
| 1  | Yes                                                                      |                                                                                                                                                             |                                                                                                                                                                                                                                                                                                                                                                                                         |   |                                            |   |                                               |    |                                                    |   |                                       |   |                                               |
| 0  | No                                                                       |                                                                                                                                                             |                                                                                                                                                                                                                                                                                                                                                                                                         |   |                                            |   |                                               |    |                                                    |   |                                       |   |                                               |
| -1 | Not applicable                                                           |                                                                                                                                                             |                                                                                                                                                                                                                                                                                                                                                                                                         |   |                                            |   |                                               |    |                                                    |   |                                       |   |                                               |
| 13 | issue_isg_text<br>Show the field ONLY if:<br>[issues_isg] = '1'          | If yes, what are they and what are your suggestions to solve them?                                                                                          | notes                                                                                                                                                                                                                                                                                                                                                                                                   |   |                                            |   |                                               |    |                                                    |   |                                       |   |                                               |
| 14 | issues_foph                                                              | Did you encounter any significant issues with the surveillance staff at FOPH?                                                                               | radio<br><table border="1"> <tr><td>1</td><td>Yes</td></tr> <tr><td>0</td><td>No</td></tr> <tr><td>-1</td><td>Not applicable</td></tr> </table>                                                                                                                                                                                                                                                         | 1 | Yes                                        | 0 | No                                            | -1 | Not applicable                                     |   |                                       |   |                                               |
| 1  | Yes                                                                      |                                                                                                                                                             |                                                                                                                                                                                                                                                                                                                                                                                                         |   |                                            |   |                                               |    |                                                    |   |                                       |   |                                               |
| 0  | No                                                                       |                                                                                                                                                             |                                                                                                                                                                                                                                                                                                                                                                                                         |   |                                            |   |                                               |    |                                                    |   |                                       |   |                                               |
| -1 | Not applicable                                                           |                                                                                                                                                             |                                                                                                                                                                                                                                                                                                                                                                                                         |   |                                            |   |                                               |    |                                                    |   |                                       |   |                                               |
| 15 | issues_foph_text<br>Show the field ONLY if:<br>[issues_foph] = '1'       | If yes, what are they and what are your suggestions to solve them?                                                                                          | notes                                                                                                                                                                                                                                                                                                                                                                                                   |   |                                            |   |                                               |    |                                                    |   |                                       |   |                                               |
| 16 | challenges_org                                                           | Does your organization experience any challenges or barriers to support the CH-SUR system?                                                                  | yesno<br><table border="1"> <tr><td>1</td><td>Yes</td></tr> <tr><td>0</td><td>No</td></tr> </table>                                                                                                                                                                                                                                                                                                     | 1 | Yes                                        | 0 | No                                            |    |                                                    |   |                                       |   |                                               |
| 1  | Yes                                                                      |                                                                                                                                                             |                                                                                                                                                                                                                                                                                                                                                                                                         |   |                                            |   |                                               |    |                                                    |   |                                       |   |                                               |
| 0  | No                                                                       |                                                                                                                                                             |                                                                                                                                                                                                                                                                                                                                                                                                         |   |                                            |   |                                               |    |                                                    |   |                                       |   |                                               |
| 17 | challenges_org_text<br>Show the field ONLY if:<br>[challenges_org] = '1' | If so, what are these challenges/barriers?                                                                                                                  | notes                                                                                                                                                                                                                                                                                                                                                                                                   |   |                                            |   |                                               |    |                                                    |   |                                       |   |                                               |
| 18 | suggestion_improve                                                       | What are your suggestions to further improve the CH-SUR surveillance system overall?                                                                        | notes<br>Custom alignment: RH                                                                                                                                                                                                                                                                                                                                                                           |   |                                            |   |                                               |    |                                                    |   |                                       |   |                                               |
| 19 | changes_pi<br>Show the field ONLY if:<br>[role] = '1'                    | Section Header: <i>Questionnaire for Hospital PIs</i><br>Results highlighted by using the CH-SUR system led to changes of practice within the organization. | radio<br><table border="1"> <tr><td>1</td><td>Strongly agree</td></tr> <tr><td>2</td><td>Agree</td></tr> <tr><td>3</td><td>Neutral</td></tr> <tr><td>4</td><td>Disagree</td></tr> <tr><td>5</td><td>Strongly disagree</td></tr> </table>                                                                                                                                                                | 1 | Strongly agree                             | 2 | Agree                                         | 3  | Neutral                                            | 4 | Disagree                              | 5 | Strongly disagree                             |
| 1  | Strongly agree                                                           |                                                                                                                                                             |                                                                                                                                                                                                                                                                                                                                                                                                         |   |                                            |   |                                               |    |                                                    |   |                                       |   |                                               |
| 2  | Agree                                                                    |                                                                                                                                                             |                                                                                                                                                                                                                                                                                                                                                                                                         |   |                                            |   |                                               |    |                                                    |   |                                       |   |                                               |
| 3  | Neutral                                                                  |                                                                                                                                                             |                                                                                                                                                                                                                                                                                                                                                                                                         |   |                                            |   |                                               |    |                                                    |   |                                       |   |                                               |
| 4  | Disagree                                                                 |                                                                                                                                                             |                                                                                                                                                                                                                                                                                                                                                                                                         |   |                                            |   |                                               |    |                                                    |   |                                       |   |                                               |
| 5  | Strongly disagree                                                        |                                                                                                                                                             |                                                                                                                                                                                                                                                                                                                                                                                                         |   |                                            |   |                                               |    |                                                    |   |                                       |   |                                               |

|    |                                                                                                           |                                                                                                                                                              |                                                                                                                                                                                                                                           |   |       |   |        |    |         |   |           |   |                           |
|----|-----------------------------------------------------------------------------------------------------------|--------------------------------------------------------------------------------------------------------------------------------------------------------------|-------------------------------------------------------------------------------------------------------------------------------------------------------------------------------------------------------------------------------------------|---|-------|---|--------|----|---------|---|-----------|---|---------------------------|
| 20 | changes_pi_text<br>Show the field ONLY if:<br>[role] = '1' and ([changes_pi] = '1' or [changes_pi] = '2') | If strongly agree or agree, which practices?                                                                                                                 | text                                                                                                                                                                                                                                      |   |       |   |        |    |         |   |           |   |                           |
| 21 | audit_case_pi<br>Show the field ONLY if:<br>[role] = '1'                                                  | Your organization regularly performs audits to ensure all eligible cases are recorded.                                                                       | radio<br><table border="1"> <tr><td>1</td><td>Yes</td></tr> <tr><td>0</td><td>No</td></tr> <tr><td>-1</td><td>Unknown</td></tr> </table>                                                                                                  | 1 | Yes   | 0 | No     | -1 | Unknown |   |           |   |                           |
| 1  | Yes                                                                                                       |                                                                                                                                                              |                                                                                                                                                                                                                                           |   |       |   |        |    |         |   |           |   |                           |
| 0  | No                                                                                                        |                                                                                                                                                              |                                                                                                                                                                                                                                           |   |       |   |        |    |         |   |           |   |                           |
| -1 | Unknown                                                                                                   |                                                                                                                                                              |                                                                                                                                                                                                                                           |   |       |   |        |    |         |   |           |   |                           |
| 22 | audit_case_pi_interval<br>Show the field ONLY if:<br>[role] = '1' and [audit_case_pi] = '1'               | If yes, at which intervals?                                                                                                                                  | radio<br><table border="1"> <tr><td>1</td><td>Daily</td></tr> <tr><td>2</td><td>Weekly</td></tr> <tr><td>3</td><td>Monthly</td></tr> <tr><td>4</td><td>Quarterly</td></tr> <tr><td>5</td><td>Less often than quarterly</td></tr> </table> | 1 | Daily | 2 | Weekly | 3  | Monthly | 4 | Quarterly | 5 | Less often than quarterly |
| 1  | Daily                                                                                                     |                                                                                                                                                              |                                                                                                                                                                                                                                           |   |       |   |        |    |         |   |           |   |                           |
| 2  | Weekly                                                                                                    |                                                                                                                                                              |                                                                                                                                                                                                                                           |   |       |   |        |    |         |   |           |   |                           |
| 3  | Monthly                                                                                                   |                                                                                                                                                              |                                                                                                                                                                                                                                           |   |       |   |        |    |         |   |           |   |                           |
| 4  | Quarterly                                                                                                 |                                                                                                                                                              |                                                                                                                                                                                                                                           |   |       |   |        |    |         |   |           |   |                           |
| 5  | Less often than quarterly                                                                                 |                                                                                                                                                              |                                                                                                                                                                                                                                           |   |       |   |        |    |         |   |           |   |                           |
| 23 | audit_accuracy_pi<br>Show the field ONLY if:<br>[role] = '1'                                              | Your organization regularly performs audits to ensure data completion/accuracy.                                                                              | radio<br><table border="1"> <tr><td>1</td><td>Yes</td></tr> <tr><td>0</td><td>No</td></tr> <tr><td>-1</td><td>Unknown</td></tr> </table>                                                                                                  | 1 | Yes   | 0 | No     | -1 | Unknown |   |           |   |                           |
| 1  | Yes                                                                                                       |                                                                                                                                                              |                                                                                                                                                                                                                                           |   |       |   |        |    |         |   |           |   |                           |
| 0  | No                                                                                                        |                                                                                                                                                              |                                                                                                                                                                                                                                           |   |       |   |        |    |         |   |           |   |                           |
| -1 | Unknown                                                                                                   |                                                                                                                                                              |                                                                                                                                                                                                                                           |   |       |   |        |    |         |   |           |   |                           |
| 24 | audit_accuracy_pi_interval<br>Show the field ONLY if:<br>[role] = '1' and [audit_accuracy_pi] = '1'       | If yes, at which intervals?                                                                                                                                  | radio<br><table border="1"> <tr><td>1</td><td>Daily</td></tr> <tr><td>2</td><td>Weekly</td></tr> <tr><td>3</td><td>Monthly</td></tr> <tr><td>4</td><td>Quarterly</td></tr> <tr><td>5</td><td>Less often than quarterly</td></tr> </table> | 1 | Daily | 2 | Weekly | 3  | Monthly | 4 | Quarterly | 5 | Less often than quarterly |
| 1  | Daily                                                                                                     |                                                                                                                                                              |                                                                                                                                                                                                                                           |   |       |   |        |    |         |   |           |   |                           |
| 2  | Weekly                                                                                                    |                                                                                                                                                              |                                                                                                                                                                                                                                           |   |       |   |        |    |         |   |           |   |                           |
| 3  | Monthly                                                                                                   |                                                                                                                                                              |                                                                                                                                                                                                                                           |   |       |   |        |    |         |   |           |   |                           |
| 4  | Quarterly                                                                                                 |                                                                                                                                                              |                                                                                                                                                                                                                                           |   |       |   |        |    |         |   |           |   |                           |
| 5  | Less often than quarterly                                                                                 |                                                                                                                                                              |                                                                                                                                                                                                                                           |   |       |   |        |    |         |   |           |   |                           |
| 25 | unusual_resource_pi<br>Show the field ONLY if:<br>[role] = '1'                                            | Were unusual resources necessary to complete tasks required by CH-SUR?<br><br>(i.e, additional manpower, finances, etc.)                                     | radio<br><table border="1"> <tr><td>1</td><td>Yes</td></tr> <tr><td>0</td><td>No</td></tr> <tr><td>-1</td><td>Unknown</td></tr> </table>                                                                                                  | 1 | Yes   | 0 | No     | -1 | Unknown |   |           |   |                           |
| 1  | Yes                                                                                                       |                                                                                                                                                              |                                                                                                                                                                                                                                           |   |       |   |        |    |         |   |           |   |                           |
| 0  | No                                                                                                        |                                                                                                                                                              |                                                                                                                                                                                                                                           |   |       |   |        |    |         |   |           |   |                           |
| -1 | Unknown                                                                                                   |                                                                                                                                                              |                                                                                                                                                                                                                                           |   |       |   |        |    |         |   |           |   |                           |
| 26 | unusual_resource_pi_text<br>Show the field ONLY if:<br>[role] = '1' and [unusual_resource_pi] = '1'       | If yes, what were these tasks?                                                                                                                               | notes                                                                                                                                                                                                                                     |   |       |   |        |    |         |   |           |   |                           |
| 27 | strategy_pi<br>Show the field ONLY if:<br>[role] = '1'                                                    | What is the long-term strategic plan in your organization to further support the system?                                                                     | notes                                                                                                                                                                                                                                     |   |       |   |        |    |         |   |           |   |                           |
| 28 | participation_pi<br>Show the field ONLY if:<br>[role] = '1'                                               | Are you willing to participate further in a voluntarily-based system?                                                                                        | yesno<br><table border="1"> <tr><td>1</td><td>Yes</td></tr> <tr><td>0</td><td>No</td></tr> </table>                                                                                                                                       | 1 | Yes   | 0 | No     |    |         |   |           |   |                           |
| 1  | Yes                                                                                                       |                                                                                                                                                              |                                                                                                                                                                                                                                           |   |       |   |        |    |         |   |           |   |                           |
| 0  | No                                                                                                        |                                                                                                                                                              |                                                                                                                                                                                                                                           |   |       |   |        |    |         |   |           |   |                           |
| 29 | participation_pi_obstacles<br>Show the field ONLY if:<br>[role] = '1' and [participation_pi] = '0'        | If not, what major obstacles must be overcome for you to participate?                                                                                        | notes                                                                                                                                                                                                                                     |   |       |   |        |    |         |   |           |   |                           |
| 30 | changes_impact_pi<br>Show the field ONLY if:<br>[role] = '1'                                              | Do you expect major other changes in the next 5 years in your system, which may impact the collaboration between you and the CH-SUR surveillance system?     | yesno<br><table border="1"> <tr><td>1</td><td>Yes</td></tr> <tr><td>0</td><td>No</td></tr> </table>                                                                                                                                       | 1 | Yes   | 0 | No     |    |         |   |           |   |                           |
| 1  | Yes                                                                                                       |                                                                                                                                                              |                                                                                                                                                                                                                                           |   |       |   |        |    |         |   |           |   |                           |
| 0  | No                                                                                                        |                                                                                                                                                              |                                                                                                                                                                                                                                           |   |       |   |        |    |         |   |           |   |                           |
| 31 | changes_impact_pi_text<br>Show the field ONLY if:<br>[role] = '1' and [changes_impact_pi] = '1'           | If yes, please briefly introduce them.                                                                                                                       | notes                                                                                                                                                                                                                                     |   |       |   |        |    |         |   |           |   |                           |
| 32 | train_nurse<br>Show the field ONLY if:<br>[role] = '2' or [role] = '1'                                    | Section Header: <i>Questionnaire for Data Providers (Study Nurses &amp; PIs)</i><br>Do you have formal training on data processing and data quality control? | yesno<br><table border="1"> <tr><td>1</td><td>Yes</td></tr> <tr><td>0</td><td>No</td></tr> </table>                                                                                                                                       | 1 | Yes   | 0 | No     |    |         |   |           |   |                           |
| 1  | Yes                                                                                                       |                                                                                                                                                              |                                                                                                                                                                                                                                           |   |       |   |        |    |         |   |           |   |                           |
| 0  | No                                                                                                        |                                                                                                                                                              |                                                                                                                                                                                                                                           |   |       |   |        |    |         |   |           |   |                           |
| 33 | train_nurse_text<br>Show the field ONLY if:<br>([role] = '2' or [role] = '1') and [train_nurse] = '1'     | If yes, what training/courses did you complete? What qualifications do you possess?                                                                          | notes                                                                                                                                                                                                                                     |   |       |   |        |    |         |   |           |   |                           |

|    |                                                                                                                        |                                                                                                                                     |                                                                                                        |
|----|------------------------------------------------------------------------------------------------------------------------|-------------------------------------------------------------------------------------------------------------------------------------|--------------------------------------------------------------------------------------------------------|
| 34 | data_proc_nurse<br>Show the field ONLY if:<br>[role] = '2' or [role] = '1'                                             | How would you describe the data processing pipeline from obtaining raw data to integration into the CH-SUR system?                  | radio<br>1 Extremely efficient<br>2 Efficient<br>3 Average<br>4 Inefficient<br>5 Extremely inefficient |
| 35 | data_qual_protocol<br>Show the field ONLY if:<br>[role] = '2' or [role] = '1'                                          | Do you have protocols on the data quality control process?                                                                          | yesno<br>1 Yes<br>0 No                                                                                 |
| 36 | data_qual_protocol_text<br>Show the field ONLY if:<br>([role] = '2' or [role] = '1') and<br>[data_qual_protocol] = '1' | If yes, what protocols/internal processes are in place to ensure data quality control?                                              | notes                                                                                                  |
| 37 | data_qual_description<br>Show the field ONLY if:<br>[role] = '2' or [role] = '1'                                       | How would you describe the data quality control process in place to monitor errors and missing values in your system?               | radio<br>1 Extremely effective<br>2 Effective<br>3 Average<br>4 Ineffective<br>5 Extremely ineffective |
| 38 | data_qual_rate<br>Show the field ONLY if:<br>[role] = '2' or [role] = '1'                                              | How would you rate the overall data quality of your system?                                                                         | radio<br>1 Excellent<br>2 Good<br>3 Fair<br>4 Poor<br>5 Extremely Poor                                 |
| 39 | concern_ppv<br>Show the field ONLY if:<br>[role] = '2' or [role] = '1'                                                 | Do you have any concerns on the completeness, validity, sensitivity, or positive predictive value (PPV) of the data in your system? | radio<br>1 Yes<br>0 No<br>-1 Not applicable                                                            |
| 40 | concern_ppv_text<br>Show the field ONLY if:<br>([role] = '2' or [role] = '1') and<br>[concern_ppv] = '1'               | If yes, what are these concerns?                                                                                                    | notes                                                                                                  |
| 41 | subpop_exclusion<br>Show the field ONLY if:<br>[role] = '2' or [role] = '1'                                            | Do you think that certain sub-populations in Switzerland are excluded/under-reported in CH-SUR?                                     | yesno<br>1 Yes<br>0 No                                                                                 |
| 42 | subpop_exclusion_text<br>Show the field ONLY if:<br>([role] = '2' or [role] = '1') and<br>[subpop_exclusion] = '1'     | If yes, specify which sub-population.                                                                                               | notes                                                                                                  |
| 43 | corr_err_approach<br>Show the field ONLY if:<br>[role] = '2' or [role] = '1'                                           | Are you aware of any approaches in place to increase the sensitivity and/or correct errors?                                         | yesno<br>1 Yes<br>0 No                                                                                 |
| 44 | corr_err_approach_text<br>Show the field ONLY if:<br>([role] = '2' or [role] = '1') and<br>[corr_err_approach] = '1'   | If yes, specify the approach.                                                                                                       | notes                                                                                                  |
| 45 | ident_simplicity<br>Show the field ONLY if:<br>[role] = '2' or [role] = '1'                                            | How simple is it to identify cases with errors or misinformation?                                                                   | radio<br>1 Extremely simple<br>2 Simple<br>3 Average<br>4 Difficult<br>5 Extremely difficult           |

|    |                                                                                                                                                                              |                                                                                                                                                                                                                                                                                          |                                                                                                                                                                                                                                                          |   |                     |   |              |   |              |   |              |   |                       |
|----|------------------------------------------------------------------------------------------------------------------------------------------------------------------------------|------------------------------------------------------------------------------------------------------------------------------------------------------------------------------------------------------------------------------------------------------------------------------------------|----------------------------------------------------------------------------------------------------------------------------------------------------------------------------------------------------------------------------------------------------------|---|---------------------|---|--------------|---|--------------|---|--------------|---|-----------------------|
| 46 | ident_simplicity_text<br>Show the field ONLY if:<br>([role] = '2' or [role] = '1') and<br>([ident_simplicity] = '3' or [ident_simplicity] = '4' or [ident_simplicity] = '5') | If answered Average, Difficult, or Extremely Difficult; what are the reasons which make it difficult to identify cases?                                                                                                                                                                  | notes                                                                                                                                                                                                                                                    |   |                     |   |              |   |              |   |              |   |                       |
| 47 | time_use<br>Show the field ONLY if:<br>[role] = '2' or [role] = '1'                                                                                                          | How much time, on average, do you spend filling the whole CRF for one case?                                                                                                                                                                                                              | radio<br><table border="1"> <tr><td>1</td><td>≤ 20 minutes</td></tr> <tr><td>2</td><td>&gt; 20 minutes</td></tr> <tr><td>3</td><td>≤ 45 minutes</td></tr> <tr><td>4</td><td>&gt; 45 minutes</td></tr> </table>                                           | 1 | ≤ 20 minutes        | 2 | > 20 minutes | 3 | ≤ 45 minutes | 4 | > 45 minutes |   |                       |
| 1  | ≤ 20 minutes                                                                                                                                                                 |                                                                                                                                                                                                                                                                                          |                                                                                                                                                                                                                                                          |   |                     |   |              |   |              |   |              |   |                       |
| 2  | > 20 minutes                                                                                                                                                                 |                                                                                                                                                                                                                                                                                          |                                                                                                                                                                                                                                                          |   |                     |   |              |   |              |   |              |   |                       |
| 3  | ≤ 45 minutes                                                                                                                                                                 |                                                                                                                                                                                                                                                                                          |                                                                                                                                                                                                                                                          |   |                     |   |              |   |              |   |              |   |                       |
| 4  | > 45 minutes                                                                                                                                                                 |                                                                                                                                                                                                                                                                                          |                                                                                                                                                                                                                                                          |   |                     |   |              |   |              |   |              |   |                       |
| 48 | followup_nurse<br>Show the field ONLY if:<br>[role] = '2' or [role] = '1'                                                                                                    | Do you need to follow-up/update cases often?                                                                                                                                                                                                                                             | yesno<br><table border="1"> <tr><td>1</td><td>Yes</td></tr> <tr><td>0</td><td>No</td></tr> </table>                                                                                                                                                      | 1 | Yes                 | 0 | No           |   |              |   |              |   |                       |
| 1  | Yes                                                                                                                                                                          |                                                                                                                                                                                                                                                                                          |                                                                                                                                                                                                                                                          |   |                     |   |              |   |              |   |              |   |                       |
| 0  | No                                                                                                                                                                           |                                                                                                                                                                                                                                                                                          |                                                                                                                                                                                                                                                          |   |                     |   |              |   |              |   |              |   |                       |
| 49 | followup_nurses_text<br>Show the field ONLY if:<br>([role] = '2' or [role] = '1') and<br>[followup_nurse] = '1'                                                              | If yes, how many times on average do you follow-up/update cases?                                                                                                                                                                                                                         | notes                                                                                                                                                                                                                                                    |   |                     |   |              |   |              |   |              |   |                       |
| 50 | workhabits_nurses<br>Show the field ONLY if:<br>[role] = '2' or [role] = '1'                                                                                                 | During peaks of infections, did your work habits change?                                                                                                                                                                                                                                 | yesno<br><table border="1"> <tr><td>1</td><td>Yes</td></tr> <tr><td>0</td><td>No</td></tr> </table>                                                                                                                                                      | 1 | Yes                 | 0 | No           |   |              |   |              |   |                       |
| 1  | Yes                                                                                                                                                                          |                                                                                                                                                                                                                                                                                          |                                                                                                                                                                                                                                                          |   |                     |   |              |   |              |   |              |   |                       |
| 0  | No                                                                                                                                                                           |                                                                                                                                                                                                                                                                                          |                                                                                                                                                                                                                                                          |   |                     |   |              |   |              |   |              |   |                       |
| 51 | workhabit_nurse_text<br>Show the field ONLY if:<br>([role] = '2' or [role] = '1') and<br>[workhabits_nurses] = '1'                                                           | If yes, briefly describe how your work habits changed.                                                                                                                                                                                                                                   | notes                                                                                                                                                                                                                                                    |   |                     |   |              |   |              |   |              |   |                       |
| 52 | training_nurses<br>Show the field ONLY if:<br>[role] = '2' or [role] = '1'                                                                                                   | Was training necessary?                                                                                                                                                                                                                                                                  | yesno<br><table border="1"> <tr><td>1</td><td>Yes</td></tr> <tr><td>0</td><td>No</td></tr> </table>                                                                                                                                                      | 1 | Yes                 | 0 | No           |   |              |   |              |   |                       |
| 1  | Yes                                                                                                                                                                          |                                                                                                                                                                                                                                                                                          |                                                                                                                                                                                                                                                          |   |                     |   |              |   |              |   |              |   |                       |
| 0  | No                                                                                                                                                                           |                                                                                                                                                                                                                                                                                          |                                                                                                                                                                                                                                                          |   |                     |   |              |   |              |   |              |   |                       |
| 53 | obtaininfo_nurses<br>Show the field ONLY if:<br>[role] = '2' or [role] = '1'                                                                                                 | Information can be easily obtained (ie: automation, pre-filling of fields during data acquisition in the CRF) from your local clinical system.                                                                                                                                           | radio<br><table border="1"> <tr><td>1</td><td>Strongly agree</td></tr> <tr><td>2</td><td>Agree</td></tr> <tr><td>3</td><td>Neutral</td></tr> <tr><td>4</td><td>Disagree</td></tr> <tr><td>5</td><td>Strongly disagree</td></tr> </table>                 | 1 | Strongly agree      | 2 | Agree        | 3 | Neutral      | 4 | Disagree     | 5 | Strongly disagree     |
| 1  | Strongly agree                                                                                                                                                               |                                                                                                                                                                                                                                                                                          |                                                                                                                                                                                                                                                          |   |                     |   |              |   |              |   |              |   |                       |
| 2  | Agree                                                                                                                                                                        |                                                                                                                                                                                                                                                                                          |                                                                                                                                                                                                                                                          |   |                     |   |              |   |              |   |              |   |                       |
| 3  | Neutral                                                                                                                                                                      |                                                                                                                                                                                                                                                                                          |                                                                                                                                                                                                                                                          |   |                     |   |              |   |              |   |              |   |                       |
| 4  | Disagree                                                                                                                                                                     |                                                                                                                                                                                                                                                                                          |                                                                                                                                                                                                                                                          |   |                     |   |              |   |              |   |              |   |                       |
| 5  | Strongly disagree                                                                                                                                                            |                                                                                                                                                                                                                                                                                          |                                                                                                                                                                                                                                                          |   |                     |   |              |   |              |   |              |   |                       |
| 54 | obtaininfo_nurses_text1<br>Show the field ONLY if:<br>([role] = '2' or [role] = '1') and<br>([obtaininfo_nurses] = '1' or [obtaininfo_nurses] = '2')                         | If agree/strongly agree, please specify which fields were automated / pre-filled in your institution.                                                                                                                                                                                    | notes                                                                                                                                                                                                                                                    |   |                     |   |              |   |              |   |              |   |                       |
| 55 | obtaininfo_nurses_text2<br>Show the field ONLY if:<br>([role] = '2' or [role] = '1') and<br>([obtaininfo_nurses] = '4' or [obtaininfo_nurses] = '5')                         | If disagree or strongly disagree, what were the difficulties you encountered?                                                                                                                                                                                                            | notes                                                                                                                                                                                                                                                    |   |                     |   |              |   |              |   |              |   |                       |
| 56 | workprocess_internal<br>Show the field ONLY if:<br>[role] = '4' or [role] = '3'                                                                                              | Section Header: <i>Questionnaire for Researchers and key CH-SUR/FOPH Surveillance Collaborators</i><br>How would you describe the working process / data request steps?<br>[Also taking into consideration the approximate time spent for each step in the CH-SUR surveillance process.] | radio<br><table border="1"> <tr><td>1</td><td>Extremely efficient</td></tr> <tr><td>2</td><td>Efficient</td></tr> <tr><td>3</td><td>Average</td></tr> <tr><td>4</td><td>Inefficient</td></tr> <tr><td>5</td><td>Extremely inefficient</td></tr> </table> | 1 | Extremely efficient | 2 | Efficient    | 3 | Average      | 4 | Inefficient  | 5 | Extremely inefficient |
| 1  | Extremely efficient                                                                                                                                                          |                                                                                                                                                                                                                                                                                          |                                                                                                                                                                                                                                                          |   |                     |   |              |   |              |   |              |   |                       |
| 2  | Efficient                                                                                                                                                                    |                                                                                                                                                                                                                                                                                          |                                                                                                                                                                                                                                                          |   |                     |   |              |   |              |   |              |   |                       |
| 3  | Average                                                                                                                                                                      |                                                                                                                                                                                                                                                                                          |                                                                                                                                                                                                                                                          |   |                     |   |              |   |              |   |              |   |                       |
| 4  | Inefficient                                                                                                                                                                  |                                                                                                                                                                                                                                                                                          |                                                                                                                                                                                                                                                          |   |                     |   |              |   |              |   |              |   |                       |
| 5  | Extremely inefficient                                                                                                                                                        |                                                                                                                                                                                                                                                                                          |                                                                                                                                                                                                                                                          |   |                     |   |              |   |              |   |              |   |                       |
| 57 | num_requests<br>Show the field ONLY if:<br>[role] = '4'                                                                                                                      | How many requests did you answer in the past 6 months ?                                                                                                                                                                                                                                  | notes                                                                                                                                                                                                                                                    |   |                     |   |              |   |              |   |              |   |                       |
| 58 | issues_crf<br>Show the field ONLY if:<br>[role] = '4' or [role] = '3'                                                                                                        | Have there been any problems adapting changes in CRF surveillance guide or other changes?                                                                                                                                                                                                | yesno<br><table border="1"> <tr><td>1</td><td>Yes</td></tr> <tr><td>0</td><td>No</td></tr> </table>                                                                                                                                                      | 1 | Yes                 | 0 | No           |   |              |   |              |   |                       |
| 1  | Yes                                                                                                                                                                          |                                                                                                                                                                                                                                                                                          |                                                                                                                                                                                                                                                          |   |                     |   |              |   |              |   |              |   |                       |
| 0  | No                                                                                                                                                                           |                                                                                                                                                                                                                                                                                          |                                                                                                                                                                                                                                                          |   |                     |   |              |   |              |   |              |   |                       |

|    |                                                                                                                              |                                                                                                                                                                                  |                                                                                                                                                                                                                                          |   |                    |   |                             |    |                           |   |                  |   |                   |
|----|------------------------------------------------------------------------------------------------------------------------------|----------------------------------------------------------------------------------------------------------------------------------------------------------------------------------|------------------------------------------------------------------------------------------------------------------------------------------------------------------------------------------------------------------------------------------|---|--------------------|---|-----------------------------|----|---------------------------|---|------------------|---|-------------------|
| 59 | issues_crf_text<br>Show the field ONLY if:<br>([role] = '4' or [role] = '3') and<br>([issues_crf]) = '1'                     | If yes, specify the problems you experienced when adapting changes in the CRF surveillance guide (as well as other changes if applicable).                                       | notes                                                                                                                                                                                                                                    |   |                    |   |                             |    |                           |   |                  |   |                   |
| 60 | response_timeliness<br>Show the field ONLY if:<br>[role] = '4' or [role] = '3'                                               | Data providers and other collaborators respond to work requests in a timely manner.                                                                                              | radio<br><table border="1"> <tr><td>1</td><td>Strongly agree</td></tr> <tr><td>2</td><td>Agree</td></tr> <tr><td>3</td><td>Average</td></tr> <tr><td>4</td><td>Disagree</td></tr> <tr><td>5</td><td>Strongly disagree</td></tr> </table> | 1 | Strongly agree     | 2 | Agree                       | 3  | Average                   | 4 | Disagree         | 5 | Strongly disagree |
| 1  | Strongly agree                                                                                                               |                                                                                                                                                                                  |                                                                                                                                                                                                                                          |   |                    |   |                             |    |                           |   |                  |   |                   |
| 2  | Agree                                                                                                                        |                                                                                                                                                                                  |                                                                                                                                                                                                                                          |   |                    |   |                             |    |                           |   |                  |   |                   |
| 3  | Average                                                                                                                      |                                                                                                                                                                                  |                                                                                                                                                                                                                                          |   |                    |   |                             |    |                           |   |                  |   |                   |
| 4  | Disagree                                                                                                                     |                                                                                                                                                                                  |                                                                                                                                                                                                                                          |   |                    |   |                             |    |                           |   |                  |   |                   |
| 5  | Strongly disagree                                                                                                            |                                                                                                                                                                                  |                                                                                                                                                                                                                                          |   |                    |   |                             |    |                           |   |                  |   |                   |
| 61 | response_timeliness_spec<br>Show the field ONLY if:<br>[role] = '4' or [role] = '3'                                          | Approximately how much time did you wait for a response to work requests?                                                                                                        | radio<br><table border="1"> <tr><td>1</td><td>Less than 24 hours</td></tr> <tr><td>2</td><td>Between 24 hours and 3 days</td></tr> <tr><td>3</td><td>More than 3 days</td></tr> </table>                                                 | 1 | Less than 24 hours | 2 | Between 24 hours and 3 days | 3  | More than 3 days          |   |                  |   |                   |
| 1  | Less than 24 hours                                                                                                           |                                                                                                                                                                                  |                                                                                                                                                                                                                                          |   |                    |   |                             |    |                           |   |                  |   |                   |
| 2  | Between 24 hours and 3 days                                                                                                  |                                                                                                                                                                                  |                                                                                                                                                                                                                                          |   |                    |   |                             |    |                           |   |                  |   |                   |
| 3  | More than 3 days                                                                                                             |                                                                                                                                                                                  |                                                                                                                                                                                                                                          |   |                    |   |                             |    |                           |   |                  |   |                   |
| 62 | response_timeliness_2<br>Show the field ONLY if:<br>[role] = '4' or [role] = '3'                                             | How timely do the data providers and other collaborators respond to your work requests?                                                                                          | radio<br><table border="1"> <tr><td>1</td><td>Less than a day</td></tr> <tr><td>2</td><td>Between 1 day and 2 days</td></tr> <tr><td>3</td><td>Between 2 days and a week</td></tr> <tr><td>4</td><td>More than a week</td></tr> </table> | 1 | Less than a day    | 2 | Between 1 day and 2 days    | 3  | Between 2 days and a week | 4 | More than a week |   |                   |
| 1  | Less than a day                                                                                                              |                                                                                                                                                                                  |                                                                                                                                                                                                                                          |   |                    |   |                             |    |                           |   |                  |   |                   |
| 2  | Between 1 day and 2 days                                                                                                     |                                                                                                                                                                                  |                                                                                                                                                                                                                                          |   |                    |   |                             |    |                           |   |                  |   |                   |
| 3  | Between 2 days and a week                                                                                                    |                                                                                                                                                                                  |                                                                                                                                                                                                                                          |   |                    |   |                             |    |                           |   |                  |   |                   |
| 4  | More than a week                                                                                                             |                                                                                                                                                                                  |                                                                                                                                                                                                                                          |   |                    |   |                             |    |                           |   |                  |   |                   |
| 63 | data_quality_internal<br>Show the field ONLY if:<br>[role] = '4'                                                             | How would you rate the overall data quality of your system?                                                                                                                      | radio<br><table border="1"> <tr><td>1</td><td>Excellent</td></tr> <tr><td>2</td><td>Good</td></tr> <tr><td>3</td><td>Fair</td></tr> <tr><td>4</td><td>Poor</td></tr> <tr><td>5</td><td>Extremely Poor</td></tr> </table>                 | 1 | Excellent          | 2 | Good                        | 3  | Fair                      | 4 | Poor             | 5 | Extremely Poor    |
| 1  | Excellent                                                                                                                    |                                                                                                                                                                                  |                                                                                                                                                                                                                                          |   |                    |   |                             |    |                           |   |                  |   |                   |
| 2  | Good                                                                                                                         |                                                                                                                                                                                  |                                                                                                                                                                                                                                          |   |                    |   |                             |    |                           |   |                  |   |                   |
| 3  | Fair                                                                                                                         |                                                                                                                                                                                  |                                                                                                                                                                                                                                          |   |                    |   |                             |    |                           |   |                  |   |                   |
| 4  | Poor                                                                                                                         |                                                                                                                                                                                  |                                                                                                                                                                                                                                          |   |                    |   |                             |    |                           |   |                  |   |                   |
| 5  | Extremely Poor                                                                                                               |                                                                                                                                                                                  |                                                                                                                                                                                                                                          |   |                    |   |                             |    |                           |   |                  |   |                   |
| 64 | concern_ppv_internal<br>Show the field ONLY if:<br>[role] = '4' or [role] = '3'                                              | Do you have any concerns on the completeness, validity, sensitivity, or positive predictive value of the data in this system?                                                    | radio<br><table border="1"> <tr><td>1</td><td>Yes</td></tr> <tr><td>0</td><td>No</td></tr> <tr><td>-1</td><td>Unknown</td></tr> </table>                                                                                                 | 1 | Yes                | 0 | No                          | -1 | Unknown                   |   |                  |   |                   |
| 1  | Yes                                                                                                                          |                                                                                                                                                                                  |                                                                                                                                                                                                                                          |   |                    |   |                             |    |                           |   |                  |   |                   |
| 0  | No                                                                                                                           |                                                                                                                                                                                  |                                                                                                                                                                                                                                          |   |                    |   |                             |    |                           |   |                  |   |                   |
| -1 | Unknown                                                                                                                      |                                                                                                                                                                                  |                                                                                                                                                                                                                                          |   |                    |   |                             |    |                           |   |                  |   |                   |
| 65 | concern_ppv_internal_text<br>Show the field ONLY if:<br>([role] = '4' or [role] = '3') and<br>([concern_ppv_internal]) = '1' | If yes, what are these concerns?                                                                                                                                                 | notes                                                                                                                                                                                                                                    |   |                    |   |                             |    |                           |   |                  |   |                   |
| 66 | subpop_excl_internal<br>Show the field ONLY if:<br>[role] = '4' or [role] = '3'                                              | Do you think that certain sub-populations in Switzerland are excluded/under-reported in CH-SUR?                                                                                  | yesno<br><table border="1"> <tr><td>1</td><td>Yes</td></tr> <tr><td>0</td><td>No</td></tr> </table>                                                                                                                                      | 1 | Yes                | 0 | No                          |    |                           |   |                  |   |                   |
| 1  | Yes                                                                                                                          |                                                                                                                                                                                  |                                                                                                                                                                                                                                          |   |                    |   |                             |    |                           |   |                  |   |                   |
| 0  | No                                                                                                                           |                                                                                                                                                                                  |                                                                                                                                                                                                                                          |   |                    |   |                             |    |                           |   |                  |   |                   |
| 67 | subpop_excl_internal_text<br>Show the field ONLY if:<br>([role] = '3' or [role] = '4') and<br>([subpop_excl_internal]) = '1' | If yes, specify which sub-populations.                                                                                                                                           | notes                                                                                                                                                                                                                                    |   |                    |   |                             |    |                           |   |                  |   |                   |
| 68 | infrastructure_fail<br>Show the field ONLY if:<br>[role] = '4' or [role] = '3'                                               | Have you experienced any failure in the work infrastructure that hindered you from completing the surveillance work on time?                                                     | notes                                                                                                                                                                                                                                    |   |                    |   |                             |    |                           |   |                  |   |                   |
| 69 | challenge_infrastructure<br>Show the field ONLY if:<br>[role] = '4' or [role] = '3'                                          | Are there any potential changes/challenges with data availability and the surveillance infrastructure that could be a threat to the stability of the CH-SUR surveillance system? | notes                                                                                                                                                                                                                                    |   |                    |   |                             |    |                           |   |                  |   |                   |

|    |                                                                                                       |                                                                                                                                                                                                                                                                                                                                                                                                                                |                                                                                                                                                                                                                                                                                                                                                                                                                           |
|----|-------------------------------------------------------------------------------------------------------|--------------------------------------------------------------------------------------------------------------------------------------------------------------------------------------------------------------------------------------------------------------------------------------------------------------------------------------------------------------------------------------------------------------------------------|---------------------------------------------------------------------------------------------------------------------------------------------------------------------------------------------------------------------------------------------------------------------------------------------------------------------------------------------------------------------------------------------------------------------------|
| 70 | testing_asymptomatic<br>Show the field ONLY if:<br>[role] = '1'                                       | Section Header: <i>Project Specific Questionnaire [ The following questions concern the testing strategy. Your answers will help us to interpret the data, especially regarding the number of nosocomial cases. The information is confidential and will not be shared outside of the project team. ]</i><br><br>In what situations do you currently test ASYMPTOMATIC patients for SARS-CoV-2?<br>(Multiple answers possible) | checkbox<br>1 testing_asymptomatic__1 Systematic screening at admission = all newly admitted patients<br>2 testing_asymptomatic__2 Patients admitted from the emergency department<br>3 testing_asymptomatic__3 Patients admitted for an elective hospitalisation<br>4 testing_asymptomatic__4 Patients admitted to specific wards only<br>5 testing_asymptomatic__5 Specific patient groups (e.g. based on risk profile) |
| 71 | testing_asymp_wards<br>Show the field ONLY if:<br>[role] = '1' and [testing_asymptomatic(4)] = '1'    | If answered: "Patients admitted to specific wards only."<br>Please specify which wards.                                                                                                                                                                                                                                                                                                                                        | notes                                                                                                                                                                                                                                                                                                                                                                                                                     |
| 72 | testing_asymp_ptgroups<br>Show the field ONLY if:<br>[role] = '1' and [testing_asymptomatic(5)] = '1' | If answered: "Specific patient groups (e.g. based on risk profile)."<br>Please specify which patient groups.                                                                                                                                                                                                                                                                                                                   | notes                                                                                                                                                                                                                                                                                                                                                                                                                     |
| 73 | testing_symptomatic<br>Show the field ONLY if:<br>[role] = '1'                                        | Do you test all SYMPTOMATIC patients?                                                                                                                                                                                                                                                                                                                                                                                          | yesno<br>1 Yes<br>0 No                                                                                                                                                                                                                                                                                                                                                                                                    |
| 74 | testing_symp_admission<br>Show the field ONLY if:<br>[role] = '1' and [testing_symptomatic] = '0'     | If answered: "No," please specify exceptions.                                                                                                                                                                                                                                                                                                                                                                                  | notes                                                                                                                                                                                                                                                                                                                                                                                                                     |
| 75 | strategy_change<br>Show the field ONLY if:<br>[role] = '1'                                            | Did the testing strategy at your hospital at admission change within the last three months?                                                                                                                                                                                                                                                                                                                                    | yesno<br>1 Yes<br>0 No                                                                                                                                                                                                                                                                                                                                                                                                    |
| 76 | strategy_change_date<br>Show the field ONLY if:<br>[role] = '1' and [strategy_change] = '1'           | When did the change/s approximately take place (dates)?                                                                                                                                                                                                                                                                                                                                                                        | notes                                                                                                                                                                                                                                                                                                                                                                                                                     |
| 77 | strategy_swissnoso_1<br>Show the field ONLY if:<br>[role] = '1' and [strategy_change] = '1'           | Was the change in line with the Swissnoso recommendation of 22.12.2022?<br>LINK: <a href="#">Swissnoso Recommendation 22.12.2022</a>                                                                                                                                                                                                                                                                                           | radio<br>1 Yes<br>0 No<br>-1 Unknown                                                                                                                                                                                                                                                                                                                                                                                      |
| 78 | strategy_swissnoso_2<br>Show the field ONLY if:<br>[role] = '1' and [strategy_change] = '1'           | Was the change in line with the Swissnoso recommendation of 31.01.2023?<br>LINK: <a href="#">Swissnoso Recommendation 31.01.2023</a>                                                                                                                                                                                                                                                                                           | radio<br>1 Yes<br>0 No<br>-1 Unknown                                                                                                                                                                                                                                                                                                                                                                                      |
| 79 | strategy_finance<br>Show the field ONLY if:<br>[role] = '1' and [strategy_change] = '1'               | Was the end of financing of COVID tests a reason for the change?                                                                                                                                                                                                                                                                                                                                                               | radio<br>1 Yes<br>0 No<br>-1 Unknown                                                                                                                                                                                                                                                                                                                                                                                      |
| 80 | strategy_change_text<br>Show the field ONLY if:<br>[role] = '1' and [strategy_change] = '1'           | Please describe the main aspects which were different before the change/s in strategy.                                                                                                                                                                                                                                                                                                                                         | notes                                                                                                                                                                                                                                                                                                                                                                                                                     |
| 81 | threshold_nosoco<br>Show the field ONLY if:<br>[role] = '1'                                           | Section Header: <i>Questions regarding Nosocomial Outbreaks</i><br>What is the threshold for nosocomial outbreaks in your institution (e.g. $\geq 3$ nosocomial cases within 5 days)?                                                                                                                                                                                                                                          | notes                                                                                                                                                                                                                                                                                                                                                                                                                     |

|    |                                                                                                           |                                                                                                                                      |                                      |
|----|-----------------------------------------------------------------------------------------------------------|--------------------------------------------------------------------------------------------------------------------------------------|--------------------------------------|
| 82 | threshold_nosoco_units<br>Show the field ONLY if:<br>[role] = '1'                                         | Is the nosocomial threshold different across units (e.g. oncology units, etc.)?                                                      | yesno<br>1 Yes<br>0 No               |
| 83 | threshold_nosoco_unit_text<br>Show the field ONLY if:<br>[role] = '1' and [threshold_nosoco_units] = '1'  | If yes, please specify which units and their different thresholds.                                                                   | notes                                |
| 84 | repeat_screen<br>Show the field ONLY if:<br>[role] = '1'                                                  | Do you repeat screening of asymptomatic patients tested in the nosocomial outbreak?                                                  | yesno<br>1 Yes<br>0 No               |
| 85 | repeat_screen_text<br>Show the field ONLY if:<br>[role] = '1' and [repeat_screen] = '1'                   | If yes, when is screening repeated?                                                                                                  | notes                                |
| 86 | screen_quarantine<br>Show the field ONLY if:<br>[role] = '1'                                              | Do you apply quarantine in parallel to screening during nosocomial outbreaks?                                                        | yesno<br>1 Yes<br>0 No               |
| 87 | strategy_change_nosoco<br>Show the field ONLY if:<br>[role] = '1'                                         | Did the testing strategy at your hospital for nosocomial outbreaks change within the last three months?                              | yesno<br>1 Yes<br>0 No               |
| 88 | strategy_nosoco_dates<br>Show the field ONLY if:<br>[role] = '1' and [strategy_change_nosoco] = '1'       | When did the change/s approximately take place (dates)?                                                                              | notes                                |
| 89 | strategy_nosoco_swiss1<br>Show the field ONLY if:<br>[role] = '1' and [strategy_change_nosoco] = '1'      | Was the change in line with the Swissnoso recommendation of 22.12.2022?<br>LINK: <a href="#">Swissnoso Recommendation 22.12.2022</a> | radio<br>1 Yes<br>0 No<br>-1 Unknown |
| 90 | strategy_nosoco_swiss2<br>Show the field ONLY if:<br>[role] = '1' and [strategy_change_nosoco] = '1'      | Was the change in line with the Swissnoso recommendation of 31.01.2023?<br>LINK: <a href="#">Swissnoso Recommendation 31.01.2023</a> | radio<br>1 Yes<br>0 No<br>-1 Unknown |
| 91 | strategy_nosoco_finance<br>Show the field ONLY if:<br>[role] = '1' and [strategy_change_nosoco] = '1'     | Was the end of financing of COVID tests a reason for the change?                                                                     | radio<br>1 Yes<br>0 No<br>-1 Unknown |
| 92 | strategy_nosoco_text<br>Show the field ONLY if:<br>[role] = '1' and [strategy_change_nosoco] = '1'        | Please describe the main aspects which were different before the change/s in strategy.                                               | notes                                |
| 93 | rsv<br>Show the field ONLY if:<br>[role] = '1'                                                            | Would it be useful to add RSV to CH-SUR?                                                                                             | yesno<br>1 Yes<br>0 No               |
| 94 | disease_other<br>Show the field ONLY if:<br>[role] = '1' or [role] = '3'                                  | Do you think that it would be useful to integrate other diseases to CH-SUR?                                                          | yesno<br>1 Yes<br>0 No               |
| 95 | disease_others<br>Show the field ONLY if:<br>([role] = '1' or [role] = '3') and [disease_other] = '1'     | If yes, which one/s?                                                                                                                 | text                                 |
| 96 | variable_other<br>Show the field ONLY if:<br>[role] = '1' or [role] = '3'                                 | Do you think that it would be useful to integrate other variables to CH-SUR?                                                         | yesno<br>1 Yes<br>0 No               |
| 97 | variable_others_2<br>Show the field ONLY if:<br>([role] = '1' or [role] = '3') and [variable_other] = '1' | If yes, which one/s?                                                                                                                 | text                                 |



|                                                                                                                                          |                                                                           |                                                                                                                                                                                                                                                |                                                                                                                                                                                                                                                                                                                                                                                                       |   |               |             |                                                             |               |                                                             |   |               |            |    |                |       |    |                |      |
|------------------------------------------------------------------------------------------------------------------------------------------|---------------------------------------------------------------------------|------------------------------------------------------------------------------------------------------------------------------------------------------------------------------------------------------------------------------------------------|-------------------------------------------------------------------------------------------------------------------------------------------------------------------------------------------------------------------------------------------------------------------------------------------------------------------------------------------------------------------------------------------------------|---|---------------|-------------|-------------------------------------------------------------|---------------|-------------------------------------------------------------|---|---------------|------------|----|----------------|-------|----|----------------|------|
| 98                                                                                                                                       | surveychsurevaluation_complete                                            | Section Header: <i>Form Status</i><br>Complete?                                                                                                                                                                                                | dropdown<br><table border="1"> <tr><td>0</td><td>Incomplete</td></tr> <tr><td>1</td><td>Unverified</td></tr> <tr><td>2</td><td>Complete</td></tr> </table>                                                                                                                                                                                                                                            | 0 | Incomplete    | 1           | Unverified                                                  | 2             | Complete                                                    |   |               |            |    |                |       |    |                |      |
| 0                                                                                                                                        | Incomplete                                                                |                                                                                                                                                                                                                                                |                                                                                                                                                                                                                                                                                                                                                                                                       |   |               |             |                                                             |               |                                                             |   |               |            |    |                |       |    |                |      |
| 1                                                                                                                                        | Unverified                                                                |                                                                                                                                                                                                                                                |                                                                                                                                                                                                                                                                                                                                                                                                       |   |               |             |                                                             |               |                                                             |   |               |            |    |                |       |    |                |      |
| 2                                                                                                                                        | Complete                                                                  |                                                                                                                                                                                                                                                |                                                                                                                                                                                                                                                                                                                                                                                                       |   |               |             |                                                             |               |                                                             |   |               |            |    |                |       |    |                |      |
| Instrument: <b>Survey Variant Recording Practices</b> (survey_variant_recording_practices)  Enabled as survey <a href="#">^ Collapse</a> |                                                                           |                                                                                                                                                                                                                                                |                                                                                                                                                                                                                                                                                                                                                                                                       |   |               |             |                                                             |               |                                                             |   |               |            |    |                |       |    |                |      |
| 99                                                                                                                                       | practice_1                                                                | Section Header: <i>Practices between January 1st, 2021 and April 5th, 2021</i><br>What tests were performed on samples collected from patients hospitalised between January 1st, 2021 and April 5th, 2021 to determine the SARS-CoV-2 variant? | checkbox, Required<br><table border="1"> <tr><td>1</td><td>practice_1__1</td><td>PCR - N501Y</td></tr> <tr><td>2</td><td>practice_1__2</td><td>PCR - E484K</td></tr> <tr><td>3</td><td>practice_1__3</td><td>Sequencing</td></tr> <tr><td>99</td><td>practice_1__99</td><td>Other</td></tr> <tr><td>98</td><td>practice_1__98</td><td>None</td></tr> </table><br>Field Annotation: @NONEOFTHEABOVE=98 | 1 | practice_1__1 | PCR - N501Y | 2                                                           | practice_1__2 | PCR - E484K                                                 | 3 | practice_1__3 | Sequencing | 99 | practice_1__99 | Other | 98 | practice_1__98 | None |
| 1                                                                                                                                        | practice_1__1                                                             | PCR - N501Y                                                                                                                                                                                                                                    |                                                                                                                                                                                                                                                                                                                                                                                                       |   |               |             |                                                             |               |                                                             |   |               |            |    |                |       |    |                |      |
| 2                                                                                                                                        | practice_1__2                                                             | PCR - E484K                                                                                                                                                                                                                                    |                                                                                                                                                                                                                                                                                                                                                                                                       |   |               |             |                                                             |               |                                                             |   |               |            |    |                |       |    |                |      |
| 3                                                                                                                                        | practice_1__3                                                             | Sequencing                                                                                                                                                                                                                                     |                                                                                                                                                                                                                                                                                                                                                                                                       |   |               |             |                                                             |               |                                                             |   |               |            |    |                |       |    |                |      |
| 99                                                                                                                                       | practice_1__99                                                            | Other                                                                                                                                                                                                                                          |                                                                                                                                                                                                                                                                                                                                                                                                       |   |               |             |                                                             |               |                                                             |   |               |            |    |                |       |    |                |      |
| 98                                                                                                                                       | practice_1__98                                                            | None                                                                                                                                                                                                                                           |                                                                                                                                                                                                                                                                                                                                                                                                       |   |               |             |                                                             |               |                                                             |   |               |            |    |                |       |    |                |      |
| 100                                                                                                                                      | practice_1_other<br>Show the field ONLY if:<br>[practice_1(99)] = '1'     | ...please specify                                                                                                                                                                                                                              | notes, Required                                                                                                                                                                                                                                                                                                                                                                                       |   |               |             |                                                             |               |                                                             |   |               |            |    |                |       |    |                |      |
| 101                                                                                                                                      | practice_1_seq                                                            | Was the investigation for VOC performed systematically?                                                                                                                                                                                        | yesno, Required<br><table border="1"> <tr><td>1</td><td>Yes</td></tr> <tr><td>0</td><td>No</td></tr> </table>                                                                                                                                                                                                                                                                                         | 1 | Yes           | 0           | No                                                          |               |                                                             |   |               |            |    |                |       |    |                |      |
| 1                                                                                                                                        | Yes                                                                       |                                                                                                                                                                                                                                                |                                                                                                                                                                                                                                                                                                                                                                                                       |   |               |             |                                                             |               |                                                             |   |               |            |    |                |       |    |                |      |
| 0                                                                                                                                        | No                                                                        |                                                                                                                                                                                                                                                |                                                                                                                                                                                                                                                                                                                                                                                                       |   |               |             |                                                             |               |                                                             |   |               |            |    |                |       |    |                |      |
| 102                                                                                                                                      | practice_1_seq_perc                                                       | How many (est.) patients from the database were investigated for VOC(in %)?                                                                                                                                                                    | text (integer, Min: 0, Max: 100), Required                                                                                                                                                                                                                                                                                                                                                            |   |               |             |                                                             |               |                                                             |   |               |            |    |                |       |    |                |      |
| 103                                                                                                                                      | practice_1_ord<br>Show the field ONLY if:<br>[practice_1(98)] != '1'      | Please tell us in which order and under what conditions those tests were performed                                                                                                                                                             | notes, Required                                                                                                                                                                                                                                                                                                                                                                                       |   |               |             |                                                             |               |                                                             |   |               |            |    |                |       |    |                |      |
| 104                                                                                                                                      | practice_1_int<br>Show the field ONLY if:<br>[practice_1(98)] != '1'      | If interpretation is needed, who interprets the result?                                                                                                                                                                                        | radio, Required<br><table border="1"> <tr><td>1</td><td>The local PI</td></tr> <tr><td>2</td><td>The study nurse/student entering the case into the database</td></tr> <tr><td>3</td><td>Both - depending on who fills the information for this case</td></tr> </table>                                                                                                                               | 1 | The local PI  | 2           | The study nurse/student entering the case into the database | 3             | Both - depending on who fills the information for this case |   |               |            |    |                |       |    |                |      |
| 1                                                                                                                                        | The local PI                                                              |                                                                                                                                                                                                                                                |                                                                                                                                                                                                                                                                                                                                                                                                       |   |               |             |                                                             |               |                                                             |   |               |            |    |                |       |    |                |      |
| 2                                                                                                                                        | The study nurse/student entering the case into the database               |                                                                                                                                                                                                                                                |                                                                                                                                                                                                                                                                                                                                                                                                       |   |               |             |                                                             |               |                                                             |   |               |            |    |                |       |    |                |      |
| 3                                                                                                                                        | Both - depending on who fills the information for this case               |                                                                                                                                                                                                                                                |                                                                                                                                                                                                                                                                                                                                                                                                       |   |               |             |                                                             |               |                                                             |   |               |            |    |                |       |    |                |      |
| 105                                                                                                                                      | practice_1_br_sa<br>Show the field ONLY if:<br>[practice_1(98)] != '1'    | How did you distinguish between the South African variant and the Brazilian variant (both positive for E484K and N501Y)                                                                                                                        | notes, Required                                                                                                                                                                                                                                                                                                                                                                                       |   |               |             |                                                             |               |                                                             |   |               |            |    |                |       |    |                |      |
| 106                                                                                                                                      | practice_1_info                                                           | What information are available to the study nurses/students about variants ?                                                                                                                                                                   | notes, Required                                                                                                                                                                                                                                                                                                                                                                                       |   |               |             |                                                             |               |                                                             |   |               |            |    |                |       |    |                |      |
| 107                                                                                                                                      | practice_1_nosample                                                       | How did you record SARS-CoV-2 variant for patients who were not investigated for VOC?                                                                                                                                                          | notes, Required                                                                                                                                                                                                                                                                                                                                                                                       |   |               |             |                                                             |               |                                                             |   |               |            |    |                |       |    |                |      |
| 108                                                                                                                                      | ensure_follow_1                                                           | Can you ensure that the described practices are followed by all the study nurses/students entering data?                                                                                                                                       | yesno, Required<br><table border="1"> <tr><td>1</td><td>Yes</td></tr> <tr><td>0</td><td>No</td></tr> </table>                                                                                                                                                                                                                                                                                         | 1 | Yes           | 0           | No                                                          |               |                                                             |   |               |            |    |                |       |    |                |      |
| 1                                                                                                                                        | Yes                                                                       |                                                                                                                                                                                                                                                |                                                                                                                                                                                                                                                                                                                                                                                                       |   |               |             |                                                             |               |                                                             |   |               |            |    |                |       |    |                |      |
| 0                                                                                                                                        | No                                                                        |                                                                                                                                                                                                                                                |                                                                                                                                                                                                                                                                                                                                                                                                       |   |               |             |                                                             |               |                                                             |   |               |            |    |                |       |    |                |      |
| 109                                                                                                                                      | diff_practice_1<br>Show the field ONLY if:<br>[ensure_follow_1] = '0'     | Please tell us how the different study nurses/students entered the data                                                                                                                                                                        | notes, Required                                                                                                                                                                                                                                                                                                                                                                                       |   |               |             |                                                             |               |                                                             |   |               |            |    |                |       |    |                |      |
| 110                                                                                                                                      | practice_change                                                           | Section Header: <i>Practices from April 5th, 2021 until now</i><br>Did the practices change from the previous practices                                                                                                                        | yesno, Required<br><table border="1"> <tr><td>1</td><td>Yes</td></tr> <tr><td>0</td><td>No</td></tr> </table>                                                                                                                                                                                                                                                                                         | 1 | Yes           | 0           | No                                                          |               |                                                             |   |               |            |    |                |       |    |                |      |
| 1                                                                                                                                        | Yes                                                                       |                                                                                                                                                                                                                                                |                                                                                                                                                                                                                                                                                                                                                                                                       |   |               |             |                                                             |               |                                                             |   |               |            |    |                |       |    |                |      |
| 0                                                                                                                                        | No                                                                        |                                                                                                                                                                                                                                                |                                                                                                                                                                                                                                                                                                                                                                                                       |   |               |             |                                                             |               |                                                             |   |               |            |    |                |       |    |                |      |
| 111                                                                                                                                      | practice_change_why<br>Show the field ONLY if:<br>[practice_change] = '1' | Why did your practice change?                                                                                                                                                                                                                  | notes, Required                                                                                                                                                                                                                                                                                                                                                                                       |   |               |             |                                                             |               |                                                             |   |               |            |    |                |       |    |                |      |
| 112                                                                                                                                      | practice_2<br>Show the field ONLY if:<br>[practice_change] = '1'          | What tests were performed on samples from patients hospitalised from April 5th, 2021 until now to determine the SARS-CoV-2 variant?                                                                                                            | checkbox, Required<br><table border="1"> <tr><td>1</td><td>practice_2__1</td><td>PCR - N501Y</td></tr> <tr><td>2</td><td>practice_2__2</td><td>PCR - E484K</td></tr> <tr><td>3</td><td>practice_2__3</td><td>Sequencing</td></tr> <tr><td>99</td><td>practice_2__99</td><td>Other</td></tr> <tr><td>98</td><td>practice_2__98</td><td>None</td></tr> </table><br>Field Annotation: @NONEOFTHEABOVE=98 | 1 | practice_2__1 | PCR - N501Y | 2                                                           | practice_2__2 | PCR - E484K                                                 | 3 | practice_2__3 | Sequencing | 99 | practice_2__99 | Other | 98 | practice_2__98 | None |
| 1                                                                                                                                        | practice_2__1                                                             | PCR - N501Y                                                                                                                                                                                                                                    |                                                                                                                                                                                                                                                                                                                                                                                                       |   |               |             |                                                             |               |                                                             |   |               |            |    |                |       |    |                |      |
| 2                                                                                                                                        | practice_2__2                                                             | PCR - E484K                                                                                                                                                                                                                                    |                                                                                                                                                                                                                                                                                                                                                                                                       |   |               |             |                                                             |               |                                                             |   |               |            |    |                |       |    |                |      |
| 3                                                                                                                                        | practice_2__3                                                             | Sequencing                                                                                                                                                                                                                                     |                                                                                                                                                                                                                                                                                                                                                                                                       |   |               |             |                                                             |               |                                                             |   |               |            |    |                |       |    |                |      |
| 99                                                                                                                                       | practice_2__99                                                            | Other                                                                                                                                                                                                                                          |                                                                                                                                                                                                                                                                                                                                                                                                       |   |               |             |                                                             |               |                                                             |   |               |            |    |                |       |    |                |      |
| 98                                                                                                                                       | practice_2__98                                                            | None                                                                                                                                                                                                                                           |                                                                                                                                                                                                                                                                                                                                                                                                       |   |               |             |                                                             |               |                                                             |   |               |            |    |                |       |    |                |      |

|     |                                                                                                    |                                                                                                                                                                             |                                                                                                                                                                                                                                                                                  |   |              |   |                                                             |   |                                                             |
|-----|----------------------------------------------------------------------------------------------------|-----------------------------------------------------------------------------------------------------------------------------------------------------------------------------|----------------------------------------------------------------------------------------------------------------------------------------------------------------------------------------------------------------------------------------------------------------------------------|---|--------------|---|-------------------------------------------------------------|---|-------------------------------------------------------------|
| 113 | practice_2_other<br>Show the field ONLY if:<br>[practice_2(99)] = '1' and [practice_change] = '1'  | ...please specify                                                                                                                                                           | notes, Required                                                                                                                                                                                                                                                                  |   |              |   |                                                             |   |                                                             |
| 114 | practice_2_seq<br>Show the field ONLY if:<br>[practice_change] = '1'                               | Was the investigation for VOC performed systematically?                                                                                                                     | yesno, Required<br><table border="1"> <tr> <td>1</td> <td>Yes</td> </tr> <tr> <td>0</td> <td>No</td> </tr> </table>                                                                                                                                                              | 1 | Yes          | 0 | No                                                          |   |                                                             |
| 1   | Yes                                                                                                |                                                                                                                                                                             |                                                                                                                                                                                                                                                                                  |   |              |   |                                                             |   |                                                             |
| 0   | No                                                                                                 |                                                                                                                                                                             |                                                                                                                                                                                                                                                                                  |   |              |   |                                                             |   |                                                             |
| 115 | practice_2_seq_perc<br>Show the field ONLY if:<br>[practice_change] = '1'                          | How many (est.) patients from the database were investigated for VOC (in %)?                                                                                                | text (integer, Min: 0, Max: 100), Required                                                                                                                                                                                                                                       |   |              |   |                                                             |   |                                                             |
| 116 | practice_2_ord<br>Show the field ONLY if:<br>[practice_change] = '1' and [practice_2(98)] != '1'   | Please tell us in which order and under what conditions those tests were performed                                                                                          | notes, Required                                                                                                                                                                                                                                                                  |   |              |   |                                                             |   |                                                             |
| 117 | practice_2_int<br>Show the field ONLY if:<br>[practice_change] = '1' and [practice_2(98)] != '1'   | If interpretation is needed, who interprets the result?                                                                                                                     | radio, Required<br><table border="1"> <tr> <td>1</td> <td>The local PI</td> </tr> <tr> <td>2</td> <td>The study nurse/student entering the case into the database</td> </tr> <tr> <td>3</td> <td>Both - depending on who fills the information for this case</td> </tr> </table> | 1 | The local PI | 2 | The study nurse/student entering the case into the database | 3 | Both - depending on who fills the information for this case |
| 1   | The local PI                                                                                       |                                                                                                                                                                             |                                                                                                                                                                                                                                                                                  |   |              |   |                                                             |   |                                                             |
| 2   | The study nurse/student entering the case into the database                                        |                                                                                                                                                                             |                                                                                                                                                                                                                                                                                  |   |              |   |                                                             |   |                                                             |
| 3   | Both - depending on who fills the information for this case                                        |                                                                                                                                                                             |                                                                                                                                                                                                                                                                                  |   |              |   |                                                             |   |                                                             |
| 118 | practice_2_br_sa<br>Show the field ONLY if:<br>[practice_change] = '1' and [practice_2(98)] != '1' | How did you distinguish between the South African variant and the Brazilian variant (both positive for E484K and N501Y)                                                     | notes, Required                                                                                                                                                                                                                                                                  |   |              |   |                                                             |   |                                                             |
| 119 | practice_2_info<br>Show the field ONLY if:<br>[practice_change] = '1'                              | What information are available to the study nurses/students about variants ?                                                                                                | notes, Required                                                                                                                                                                                                                                                                  |   |              |   |                                                             |   |                                                             |
| 120 | practice_2_nosample<br>Show the field ONLY if:<br>[practice_change] = '1'                          | How did you record SARS-CoV-2 variant for patients who were not investigated for VOC?                                                                                       | notes, Required                                                                                                                                                                                                                                                                  |   |              |   |                                                             |   |                                                             |
| 121 | ensure_follow_2<br>Show the field ONLY if:<br>[practice_change] = '1'                              | Can you ensure that the described practices are followed by all the study nurses/students entering data?                                                                    | yesno, Required<br><table border="1"> <tr> <td>1</td> <td>Yes</td> </tr> <tr> <td>0</td> <td>No</td> </tr> </table>                                                                                                                                                              | 1 | Yes          | 0 | No                                                          |   |                                                             |
| 1   | Yes                                                                                                |                                                                                                                                                                             |                                                                                                                                                                                                                                                                                  |   |              |   |                                                             |   |                                                             |
| 0   | No                                                                                                 |                                                                                                                                                                             |                                                                                                                                                                                                                                                                                  |   |              |   |                                                             |   |                                                             |
| 122 | diff_practice_2<br>Show the field ONLY if:<br>[ensure_follow_2] = '0' and [practice_change] = '1'  | Please tell us how the different study nurses/students entered the data                                                                                                     | notes, Required                                                                                                                                                                                                                                                                  |   |              |   |                                                             |   |                                                             |
| 123 | dummy_1                                                                                            | For better understanding the data, please make sure all data collectors enter the information the same way!<br><br>If your practices come to change, please inform us ASAP! | descriptive                                                                                                                                                                                                                                                                      |   |              |   |                                                             |   |                                                             |
| 124 | survey_variant_recording_practices_complete                                                        | Section Header: <i>Form Status</i><br>Complete?                                                                                                                             | dropdown<br><table border="1"> <tr> <td>0</td> <td>Incomplete</td> </tr> <tr> <td>1</td> <td>Unverified</td> </tr> <tr> <td>2</td> <td>Complete</td> </tr> </table>                                                                                                              | 0 | Incomplete   | 1 | Unverified                                                  | 2 | Complete                                                    |
| 0   | Incomplete                                                                                         |                                                                                                                                                                             |                                                                                                                                                                                                                                                                                  |   |              |   |                                                             |   |                                                             |
| 1   | Unverified                                                                                         |                                                                                                                                                                             |                                                                                                                                                                                                                                                                                  |   |              |   |                                                             |   |                                                             |
| 2   | Complete                                                                                           |                                                                                                                                                                             |                                                                                                                                                                                                                                                                                  |   |              |   |                                                             |   |                                                             |
